# Supplementary material for: Random plasma glucose levels and cause-specific mortality among Chinese adults without known diabetes: an 11-year prospective study of 450,000 people
Source: HighWire-hosted journal article supplement (doi:10.1136/bmjdrc-2021-002495), 2021-11-01

*This page is intentionally left blank*

## Random plasma glucose levels and cause-specific mortality among Chinese adults without known diabetes: an 11-year prospective study of 450,000 people

### Online-Only Supplemental Material, Table of Contents

|                                                                                                                                                                                         | <b>Page</b> |
|-----------------------------------------------------------------------------------------------------------------------------------------------------------------------------------------|-------------|
| China Kadoorie Biobank collaborative group and members                                                                                                                                  | 2           |
| <b>Table S1.</b> ICD10 classified causes of death                                                                                                                                       | 3           |
| <b>Table S2.</b> Sensitivity analyses of the associations of usual random plasma glucose with mortality from selected major diseases, applying additional adjustments and/or exclusions | 4           |
| <b>Table S3.</b> Associations of baseline random plasma glucose with mortality from selected major diseases                                                                             | 5           |
| <b>Figure S1.</b> Associations of usual random plasma glucose with mortality from selected major diseases                                                                               | 6           |
| <b>Figure S2.</b> Associations of usual random plasma glucose with cancer mortality                                                                                                     | 7           |
| <b>Figure S3.</b> Associations of usual random plasma glucose with cardiovascular disease mortality                                                                                     | 8           |
| <b>Figure S4.</b> Associations of usual random plasma glucose with all-cause mortality in selected population subgroups                                                                 | 9           |
| <b>Figure S5.</b> Associations of usual random plasma glucose with cancer mortality                                                                                                     | 10          |
| <b>Figure S6.</b> Associations of usual random plasma glucose with all-cause, cardiovascular disease and cancer mortality by study area                                                 | 11          |
| <b>Figure S7.</b> Associations of usual random plasma glucose with liver disease mortality                                                                                              | 12          |
| <b>Figure S8.</b> Associations of usual random plasma glucose with respiratory disease mortality                                                                                        | 13          |

### China Kadoorie Biobank collaborative group and members

**International Steering Committee:** Junshi Chen, Zhengming Chen (PI), Robert Clarke, Rory Collins, Yu Guo, Liming Li (PI), Chen Wang, Jun Lv, Richard Peto, Robin Walters

**International Co-ordinating Centre, Oxford:** Daniel Avery, Fiona Bragg, Derrick Bennett, Ruth Boxall, Ka Hung Chan, Yumei Chang, Yiping Chen, Zhengming Chen, Johnathan Clarke; Robert Clarke, Huaidong Du, Zамmy Fairhurst-Hunter, Hannah Fry, Wei Gan, Simon Gilbert, Alex Hacker, Parisa Hariri, Mike Hill, Michael Holmes, Pek Kei Im, Andri Iona, Maria Kakkoura, Christiana Kartsonaki, Rene Kerosi, Kuang Lin, Mohsen Mazidi, Iona Millwood, Qunhua Nie, Alfred Pozarickij, Paul Ryder, Sam Sansome, Dan Schmidt, Paul Sherliker, Rajani Sohoni, Becky Stevens, Iain Turnbull, Robin Walters, Lin Wang, Neil Wright, Ling Yang, Xiaoming Yang, Pang Yao

**National Co-ordinating Centre, Beijing:** Yu Guo, Xiao Han, Can Hou, Chun Li, Chao Liu, Jun Lv, Pei Pei, Canqing Yu

#### 10 Regional Co-ordinating Centres:

**Guangxi** Provincial CDC: Naying Chen, Duo Liu, Zhenzhu Tang. **Liuzhou** CDC: Ningyu Chen, Qilian Jiang, Jian Lan, Mingqiang Li, Yun Liu, Fanwen Meng, Jinhui Meng, Rong Pan, Yulu Qin, Ping Wang, Sisi Wang, Liuping Wei, Liyuan Zhou. **Gansu** Provincial CDC: Caixia Dong, Pengfei Ge, Xiaolan Ren. **Maiji** CDC: Zhongxiao Li, Enke Mao, Tao Wang, Hui Zhang, Xi Zhang. **Hainan** Provincial CDC: Jinyan Chen, Ximin Hu, Xiaohuan Wang. **Meilan** CDC: Zhendong Guo, Huimei Li, Yilei Li, Min Weng, Shukuan Wu. **Heilongjiang** Provincial CDC: Shichun Yan, Mingyuan Zou, Xue Zhou. **Nangang** CDC: Ziyan Guo, Quan Kang, Yanjie Li, Bo Yu, Qinai Xu. **Henan** Provincial CDC: Liang Chang, Lei Fan, Shixian Feng, Ding Zhang, Gang Zhou. **Huixian** CDC: Yulian Gao, Tianyou He, Pan He, Chen Hu, Huarong Sun, Xukui Zhang. **Hunan** Provincial CDC: Biyun Chen, Zhongxi Fu, Yuelong Huang, Huilin Liu, Qiaohua Xu, Li Yin. **Liuyang** CDC: Huajun Long, Xin Xu, Hao Zhang, Libo Zhang. **Jiangsu** Provincial CDC: Jian Su, Ran Tao, Ming Wu, Jie Yang, Jinyi Zhou, Yonglin Zhou. **Suzhou** CDC: Yihe Hu, Yujie Hua, Jianrong Jin Fang Liu, Jingchao Liu, Yan Lu, Liangcai Ma, Aiyu Tang, Jun Zhang. **Qingdao** Qingdao CDC: Liang Cheng, Ranran Du, Ruqin Gao, Feifei Li, Shanpeng Li, Yongmei Liu, Feng Ning, Zengchang Pang, Xiaohui Sun, Xiaocao Tian, Shaojie Wang, Yaoming Zhai, Hua Zhang, Licang CDC: Wei Hou, Silu Lv, Junzheng Wang. **Sichuan** Provincial CDC: Xiaofang Chen, Xianping Wu, Ningmei Zhang, Weiwei Zhou. **Pengzhou** CDC: Xiaofang Chen, Jianguo Li, Jiaqiu Liu, Guojin Luo, Qiang Sun, Xunfu Zhong. **Zhejiang** Provincial CDC: Weiwei Gong, Ruying Hu, Hao Wang, Meng Wan, Min Yu. **Tongxiang** CDC: Lingli Chen, Qijun Gu, Dongxia Pan, Chunmei Wang, Kaixu Xie, Xiaoyi Zhang

**Table S1. ICD10 classified causes of death**

| Category                  | ICD-10 codes                                                                                                                                                 |
|---------------------------|--------------------------------------------------------------------------------------------------------------------------------------------------------------|
| All-cause mortality       | Any ICD-10 code                                                                                                                                              |
| CVD                       | I00-I25, I28-I99, E10.5, E11.5, E12.5, E13.5, E14.5                                                                                                          |
| Ischaemic heart disease   | I20-I25                                                                                                                                                      |
| Stroke                    | I60-I64                                                                                                                                                      |
| Other CVD                 | I00-I15, I28-I59, I65-I99, E10.5, E11.5, E12.5, E13.5, E14.5                                                                                                 |
| Respiratory disease       | I26-I27, J00-J11, J20-J99                                                                                                                                    |
| COPD                      | I26-I27, J40-J44                                                                                                                                             |
| Other respiratory disease | J00-J11, J20-J39, J45-J99                                                                                                                                    |
| Chronic liver disease     | B18-B19, B25.1, K70.0-K70.9, K72.1-K74, K75.2-K75.9, P35.3, Z22.5                                                                                            |
| Liver cirrhosis           | K70.3, K74                                                                                                                                                   |
| Viral hepatitis           | B18-B19, B25.1                                                                                                                                               |
| Other liver disease       | K70.0-K70.2, K70.4, K70.9, K72.1-K73, K75.2-K75.9, P35.3, Z22.5                                                                                              |
| Chronic kidney disease    | I12.0-I13.9, E10.2, E11.2, E12.2, E13.2, E14.2, M10.3, M32.1, N02-N05, N08.3, N11-N13, N15, N18-N19, N25-N26, N27.1, N27.9, O10.2-O10.3, R94.4, T86.1, Z94.0 |
| Infection                 | A00-B17, B20-B25, B25.2-B99, J12-J18                                                                                                                         |
| Pneumonia                 | J12-J18                                                                                                                                                      |
| Other infection           | A00-B17, B20-B25.0, B25.2-B99                                                                                                                                |
| Cancer                    | C00-C97                                                                                                                                                      |
| Oesophageal               | C15                                                                                                                                                          |
| Stomach                   | C16                                                                                                                                                          |
| Colorectal                | C18-C20                                                                                                                                                      |
| Liver                     | C22                                                                                                                                                          |
| Pancreatic                | C25                                                                                                                                                          |
| Lung                      | C33-C34                                                                                                                                                      |
| Female breast             | C50                                                                                                                                                          |
| Female reproductive       | C53, C54.1, C56                                                                                                                                              |
| Other site                | C00-C14, C17, C21, C23-C24, C26-C32, C35-C49, C51-C52, C54.0, C54.2-C55, C57-C97                                                                             |
| External                  | V01-Y98                                                                                                                                                      |
| Other medical             | Any ICD-10 code excluding the cause-specific mortality codes listed above                                                                                    |

COPD=chronic obstructive pulmonary disease; CVD=cardiovascular disease

**Table S2. Sensitivity analyses of the associations of usual random plasma glucose with mortality from selected major diseases, applying additional adjustments and/or exclusions**

|                                                                             | All cause |      |             | Cardiovascular disease |      |             | Cancer |      |             | Infection |      |             | Chronic liver disease |      |             | Chronic kidney disease |      |             |
|-----------------------------------------------------------------------------|-----------|------|-------------|------------------------|------|-------------|--------|------|-------------|-----------|------|-------------|-----------------------|------|-------------|------------------------|------|-------------|
|                                                                             | n         | HR*  | 95% CI      | n                      | HR*  | 95% CI      | n      | HR*  | 95% CI      | n         | HR*  | 95% CI      | n                     | HR*  | 95% CI      | n                      | HR*  | 95% CI      |
| Main model†                                                                 | 35700     | 1.14 | (1.12-1.16) | 13536                  | 1.16 | (1.12-1.16) | 12316  | 1.12 | (1.09-1.16) | 686       | 1.19 | (1.04-1.36) | 522                   | 1.45 | (1.26-1.66) | 369                    | 1.44 | (1.22-1.70) |
| Additionally adjusted for dietary variables‡                                | 35700     | 1.14 | (1.12-1.16) | 13536                  | 1.15 | (1.12-1.19) | 12316  | 1.12 | (1.08-1.16) | 686       | 1.19 | (1.04-1.36) | 522                   | 1.44 | (1.25-1.66) | 369                    | 1.44 | (1.22-1.70) |
| Additionally adjusted for fasting time                                      | 35700     | 1.14 | (1.12-1.16) | 13536                  | 1.15 | (1.11-1.18) | 12316  | 1.13 | (1.09-1.17) | 686       | 1.20 | (1.04-1.37) | 522                   | 1.45 | (1.25-1.67) | 369                    | 1.45 | (1.22-1.72) |
| Additionally excluding the first 3 years of follow-up                       | 29698     | 1.12 | (1.10-1.14) | 11572                  | 1.15 | (1.11-1.18) | 10131  | 1.09 | (1.05-1.13) | 592       | 1.16 | (1.01-1.34) | 406                   | 1.32 | (1.12-1.56) | 304                    | 1.46 | (1.21-1.75) |
| Additionally excluding participants who developed diabetes during follow-up | 33912     | 1.14 | (1.12-1.17) | 12860                  | 1.16 | (1.13-1.19) | 11814  | 1.13 | (1.10-1.17) | 646       | 1.21 | (1.05-1.39) | 499                   | 1.48 | (1.28-1.72) | 311                    | 1.34 | (1.11-1.63) |
| Additionally excluding participants from Zhejiang                           | 34139     | 1.14 | (1.12-1.16) | 13077                  | 1.15 | (1.12-1.19) | 11438  | 1.12 | (1.08-1.16) | 666       | 1.20 | (1.05-1.37) | 505                   | 1.43 | (1.23-1.65) | 356                    | 1.50 | (1.27-1.78) |
| Additionally excluding participants with poor self-rated health             | 30120     | 1.13 | (1.11-1.16) | 11257                  | 1.14 | (1.10-1.18) | 10952  | 1.11 | (1.07-1.15) | 595       | 1.15 | (1.00-1.33) | 432                   | 1.44 | (1.23-1.68) | 315                    | 1.32 | (1.09-1.59) |

\*HR per 1 mmol/L higher usual random plasma glucose

†Stratified by age-at-risk, sex and study area and adjusted for education, smoking, alcohol, physical activity, body mass index, waist and hip circumference and systolic blood pressure

‡Frequency of consumption of soybean products, preserved vegetables, fresh fruit, fresh vegetables, meat, poultry, fish/seafood, fresh eggs, dairy products, rice, wheat, other staple food

**Table S3. Associations of baseline random plasma glucose with mortality from selected major diseases**

| Baseline<br>RPG, mmol/L | All-cause |      |             | Cardiovascular<br>disease |      |             | Cancer |      |             | Infection |      |             | Chronic liver disease |      |             | Chronic kidney<br>disease |      |             |
|-------------------------|-----------|------|-------------|---------------------------|------|-------------|--------|------|-------------|-----------|------|-------------|-----------------------|------|-------------|---------------------------|------|-------------|
|                         | Deaths    | HR   | 95% CI      | Deaths                    | HR   | 95% CI      | Deaths | HR   | 95% CI      | Deaths    | HR   | 95% CI      | Deaths                | HR   | 95% CI      | Deaths                    | HR   | (95% CI)    |
| <4.8                    | 5663      | 1.00 | (0.97-1.03) | 2031                      | 1.00 | (0.96-1.05) | 1946   | 1.00 | (0.96-1.05) | 101       | 1.00 | (0.81-1.22) | 81                    | 1.00 | (0.80-1.25) | 55                        | 1.00 | (0.76-1.31) |
| 4.8 – 5.2               | 6353      | 1.01 | (0.98-1.03) | 2356                      | 1.08 | (1.03-1.12) | 2242   | 0.99 | (0.95-1.03) | 123       | 0.97 | (0.81-1.16) | 86                    | 1.01 | (0.82-1.25) | 48                        | 0.82 | (0.62-1.09) |
| 5.3 – 5.7               | 6597      | 1.01 | (0.99-1.03) | 2432                      | 1.06 | (1.02-1.11) | 2362   | 1.01 | (0.97-1.05) | 102       | 0.74 | (0.61-0.90) | 78                    | 0.91 | (0.72-1.13) | 66                        | 1.07 | (0.84-1.36) |
| 5.8 – 6.4               | 7304      | 1.06 | (1.03-1.08) | 2829                      | 1.13 | (1.09-1.17) | 2543   | 1.06 | (1.01-1.10) | 139       | 0.96 | (0.81-1.13) | 110                   | 1.21 | (1.01-1.46) | 79                        | 1.20 | (0.96-1.49) |
| 6.5 – 7.5               | 5617      | 1.11 | (1.08-1.14) | 2179                      | 1.14 | (1.10-1.19) | 1910   | 1.12 | (1.07-1.17) | 128       | 1.20 | (1.01-1.43) | 90                    | 1.36 | (1.10-1.67) | 60                        | 1.23 | (0.95-1.58) |
| 7.6 – 11.0              | 4166      | 1.28 | (1.24-1.32) | 1709                      | 1.34 | (1.27-1.40) | 1313   | 1.22 | (1.16-1.29) | 93        | 1.35 | (1.09-1.65) | 77                    | 1.83 | (1.46-2.29) | 61                        | 1.99 | (1.54-2.56) |
| ≥11.1                   | 1514      | 1.93 | (1.84-2.04) | 673                       | 2.11 | (1.95-2.28) | 364    | 1.42 | (1.28-1.57) | 25        | 1.67 | (1.12-2.48) | 25                    | 2.31 | (1.55-3.45) | 63                        | 8.33 | (6.42-10.8) |
| <i>P for trend</i>      |           |      | <0.001      |                           |      | <0.001      |        |      | <0.001      |           |      | 0.002       |                       |      | <0.001      |                           |      | <0.001      |
| Per 1 mmol/L*           | 35700     | 1.14 | (1.12-1.16) | 13536                     | 1.16 | (1.12-1.19) | 12316  | 1.12 | (1.09-1.16) | 686       | 1.19 | (1.04-1.36) | 522                   | 1.45 | (1.26-1.66) | 369                       | 1.44 | (1.22-1.70) |

\*Excluding participants with baseline RPG &lt;11.1 mmol/L

HRs are stratified by age-at-risk, sex and study area and adjusted for education, smoking, alcohol, physical activity, body mass index, waist and hip circumference and systolic blood pressure

RPG=random plasma glucose

### Figure S1. Associations of usual random plasma glucose with mortality from selected major diseases

HRs are presented stratified by age-at-risk, sex and study area and adjusted for education, smoking, alcohol, physical activity, body mass index, waist and hip circumference and systolic blood pressure. HRs are plotted against mean usual RPG level in each category. Squares represent the HR with area inversely proportional to the variance of the log HR. Grey squares represent the HR among participants with screen-detected diabetes (baseline RPG  $\geq 11.1$  mmol/L). Vertical lines indicate the 95% CI. CVD=cardiovascular disease, RPG=random plasma glucose.

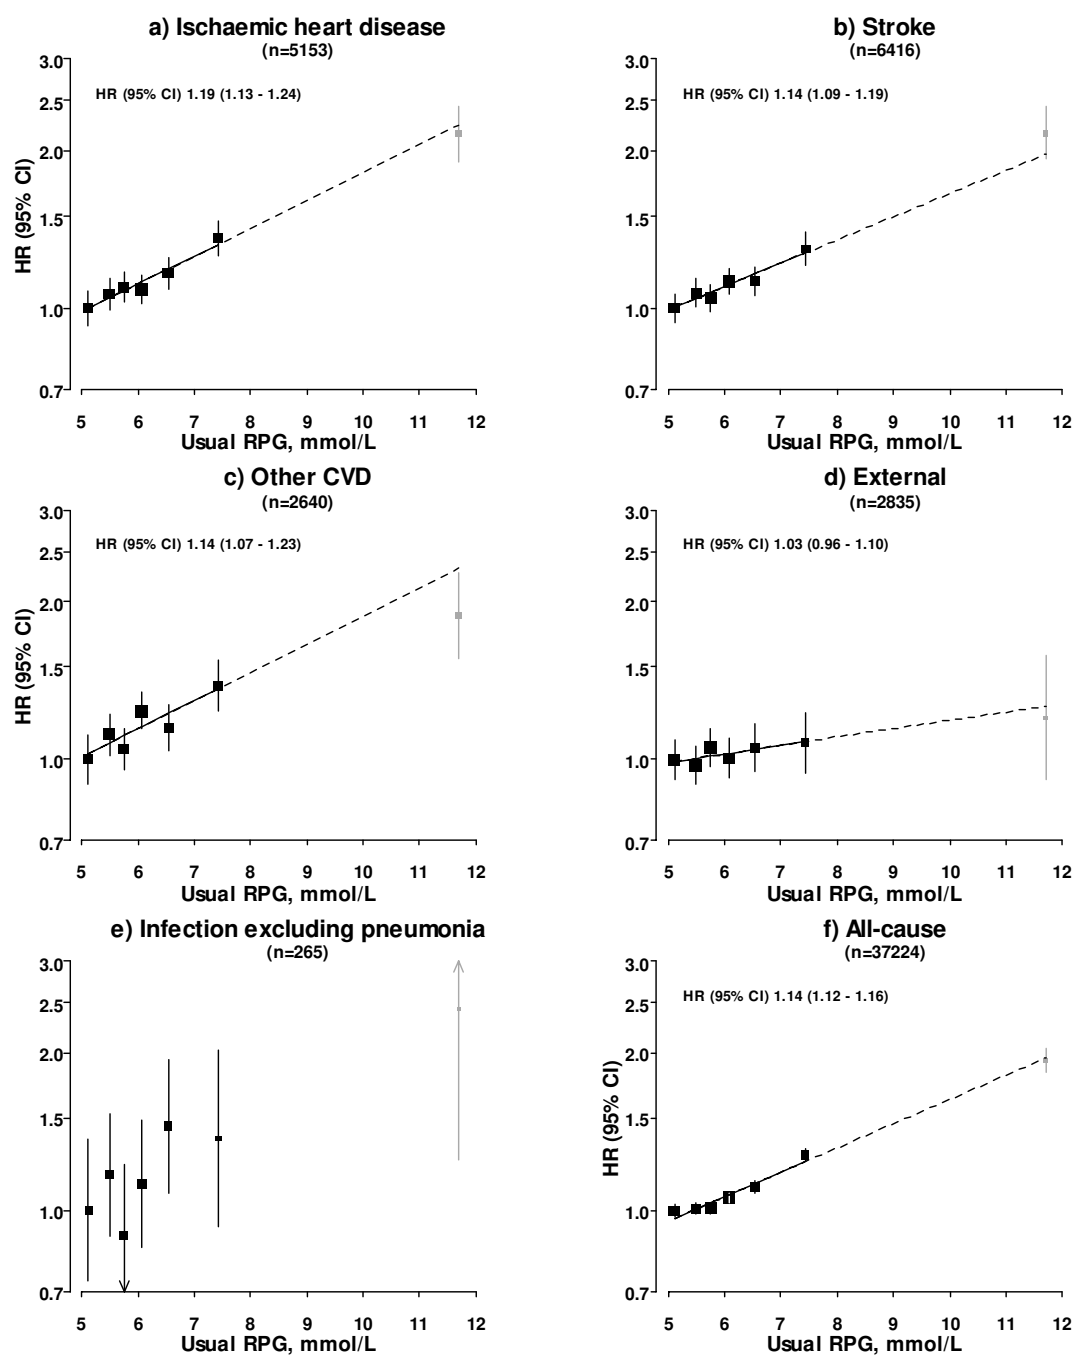

**Figure S2. Associations of usual random plasma glucose with cancer mortality**

HRs are presented stratified by age-at-risk, sex and study area and adjusted for education, smoking, alcohol, physical activity, body mass index, waist and hip circumference and systolic blood pressure. HRs are plotted against mean usual RPG level in each category. Squares represent the HR with area inversely proportional to the variance of the log HR. Grey squares represent the HR among participants with screen-detected diabetes (baseline RPG  $\geq 11.1$  mmol/L). Vertical lines indicate the 95% CI. RPG=random plasma glucose.

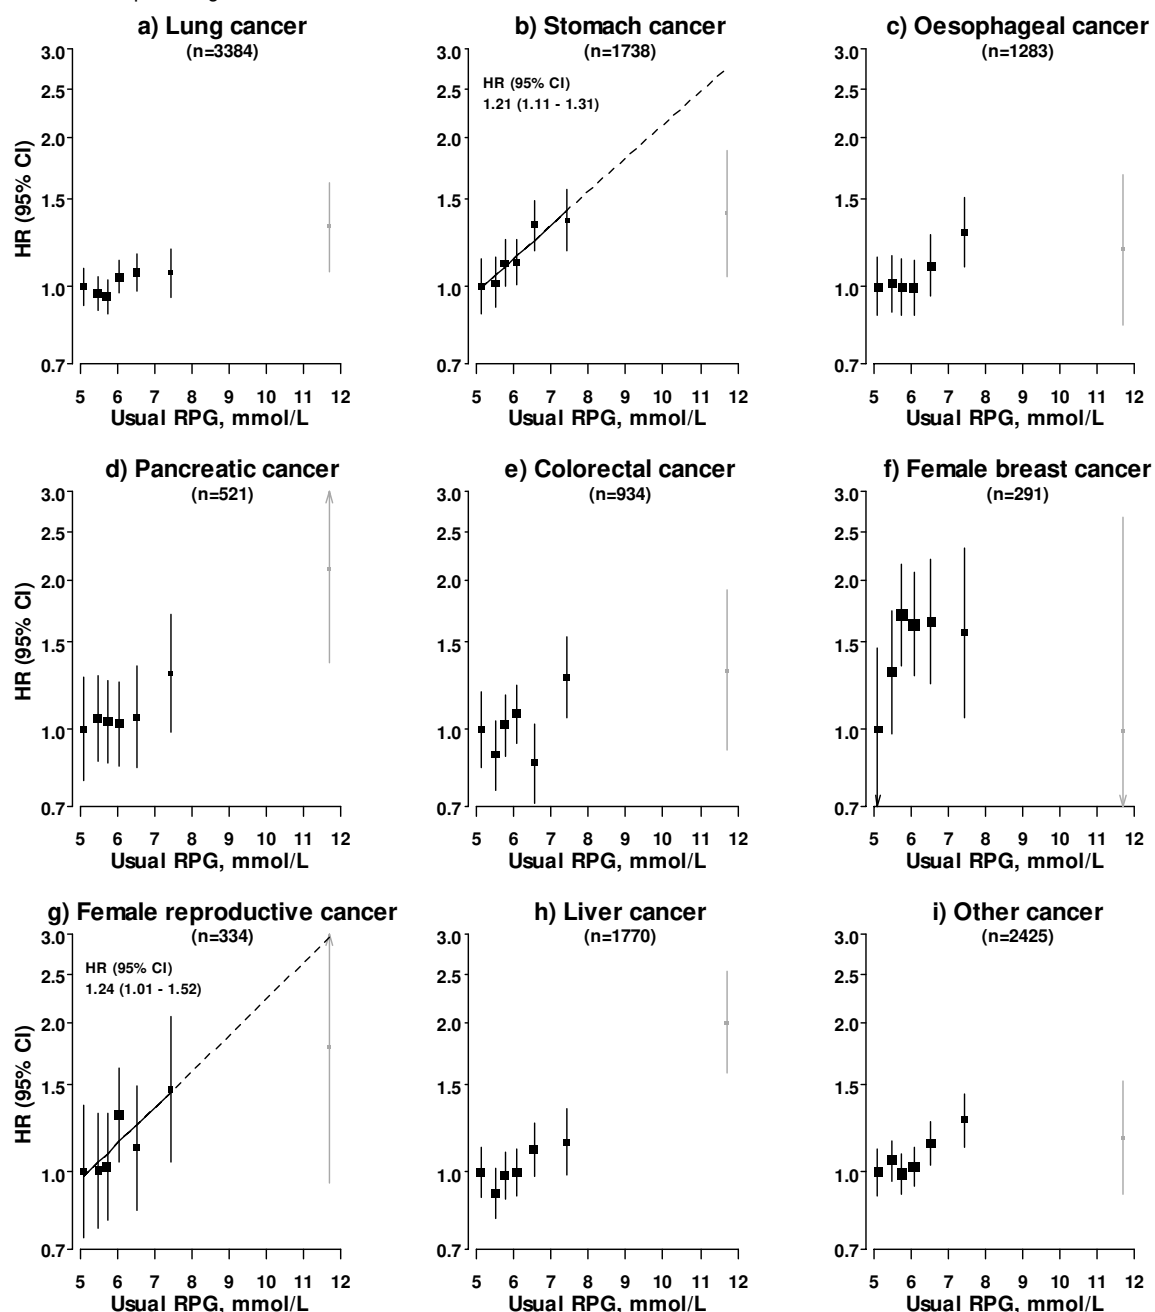



### Figure S3. Associations of usual random plasma glucose with cardiovascular disease mortality

HRs are calculated per 1.0 mmol/L higher usual random plasma glucose. Results are stratified by age-at-risk, sex and study area and adjusted for education, smoking, alcohol, physical activity, body mass index, waist and hip circumference and systolic blood pressure, except where the variable of interest. Participants with screen-detected diabetes at baseline are excluded. Squares represent the HR with area inversely proportional to the variance of the log HR. Horizontal lines represent the corresponding 95% CI. The open diamond represents the overall HR and its 95% CI. BMI=body mass index; MET-h/day=metabolic equivalent of task hours per day; SBP=systolic blood pressure.

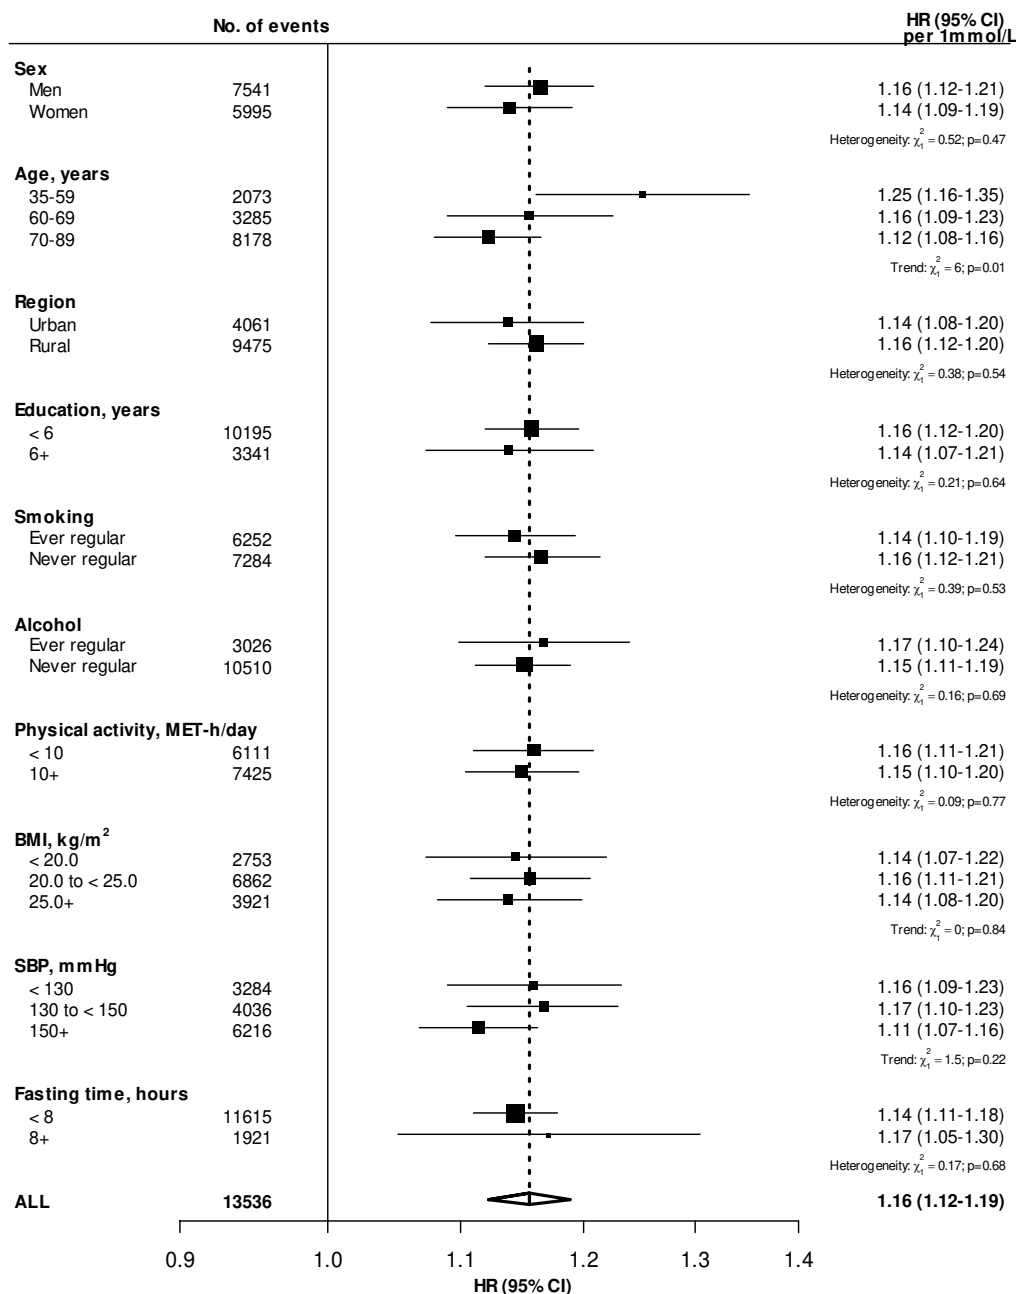

### Figure S4. Associations of usual random plasma glucose with all-cause mortality in selected population subgroups

HRs are calculated per 1.0 mmol/L higher usual random plasma glucose. Results are stratified by age-at-risk, sex and study area and adjusted for education, smoking, alcohol, physical activity, body mass index, waist and hip circumference and systolic blood pressure, except where the variable of interest. Participants with screen-detected diabetes at baseline are excluded. Squares represent the HR with area inversely proportional to the variance of the log HR. Horizontal lines represent the corresponding 95% CI. The open diamond represents the overall HR and its 95% CI. BMI=body mass index; MET-h/day=metabolic equivalent of task hours per day; RPG=random plasma glucose; SBP=systolic blood pressure.

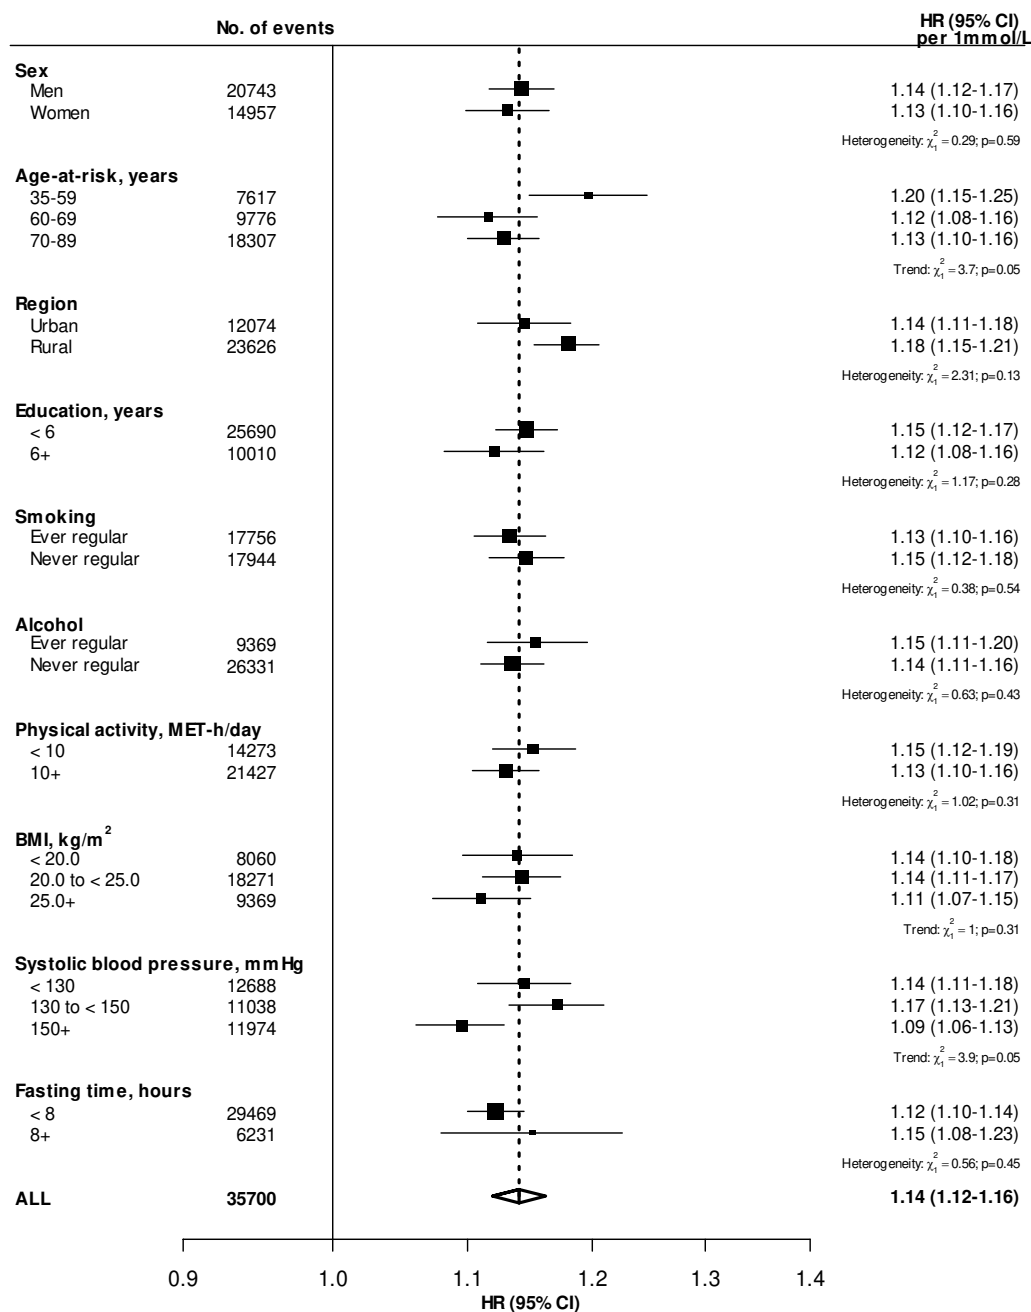

**Figure S5. Associations of usual random plasma glucose with cancer mortality**

HRs are calculated per 1.0 mmol/L higher usual random plasma glucose. Results are stratified by age-at-risk, sex and study area and adjusted for education, smoking, alcohol, physical activity, body mass index, waist and hip circumference and systolic blood pressure, except where the variable of interest. Participants with screen-detected diabetes at baseline are excluded. Squares represent the HR with area inversely proportional to the variance of the log HR. Horizontal lines represent the corresponding 95% CI. The open diamond represents the overall HR and its 95% CI. BMI=body mass index; MET-h/day=metabolic equivalent of task hours per day; SBP=systolic blood pressure.

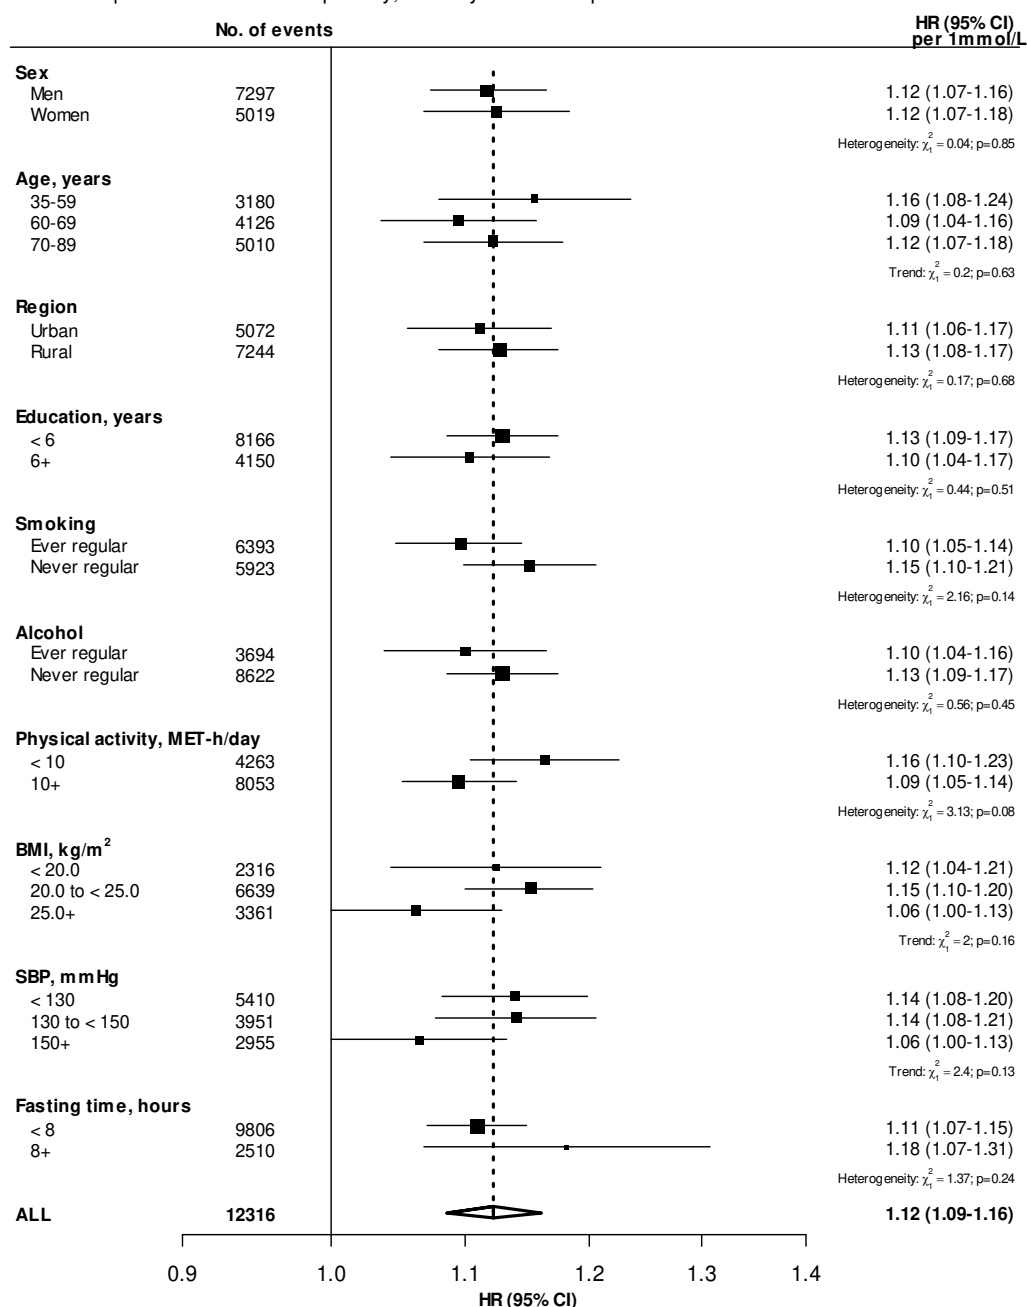

### Figure S6. Associations of usual random plasma glucose with all-cause, cardiovascular disease and cancer mortality by study area

HRs are calculated per 1.0 mmol/L higher usual random plasma glucose. Results are stratified by age-at-risk and sex and adjusted for education, smoking, alcohol, physical activity, body mass index, waist and hip circumference and systolic blood pressure. Participants with screen-detected diabetes at baseline are excluded. Squares represent the HR with area inversely proportional to the variance of the log HR. Horizontal lines represent the corresponding 95% CI. The open diamond represents the overall HR and its 95% CI.

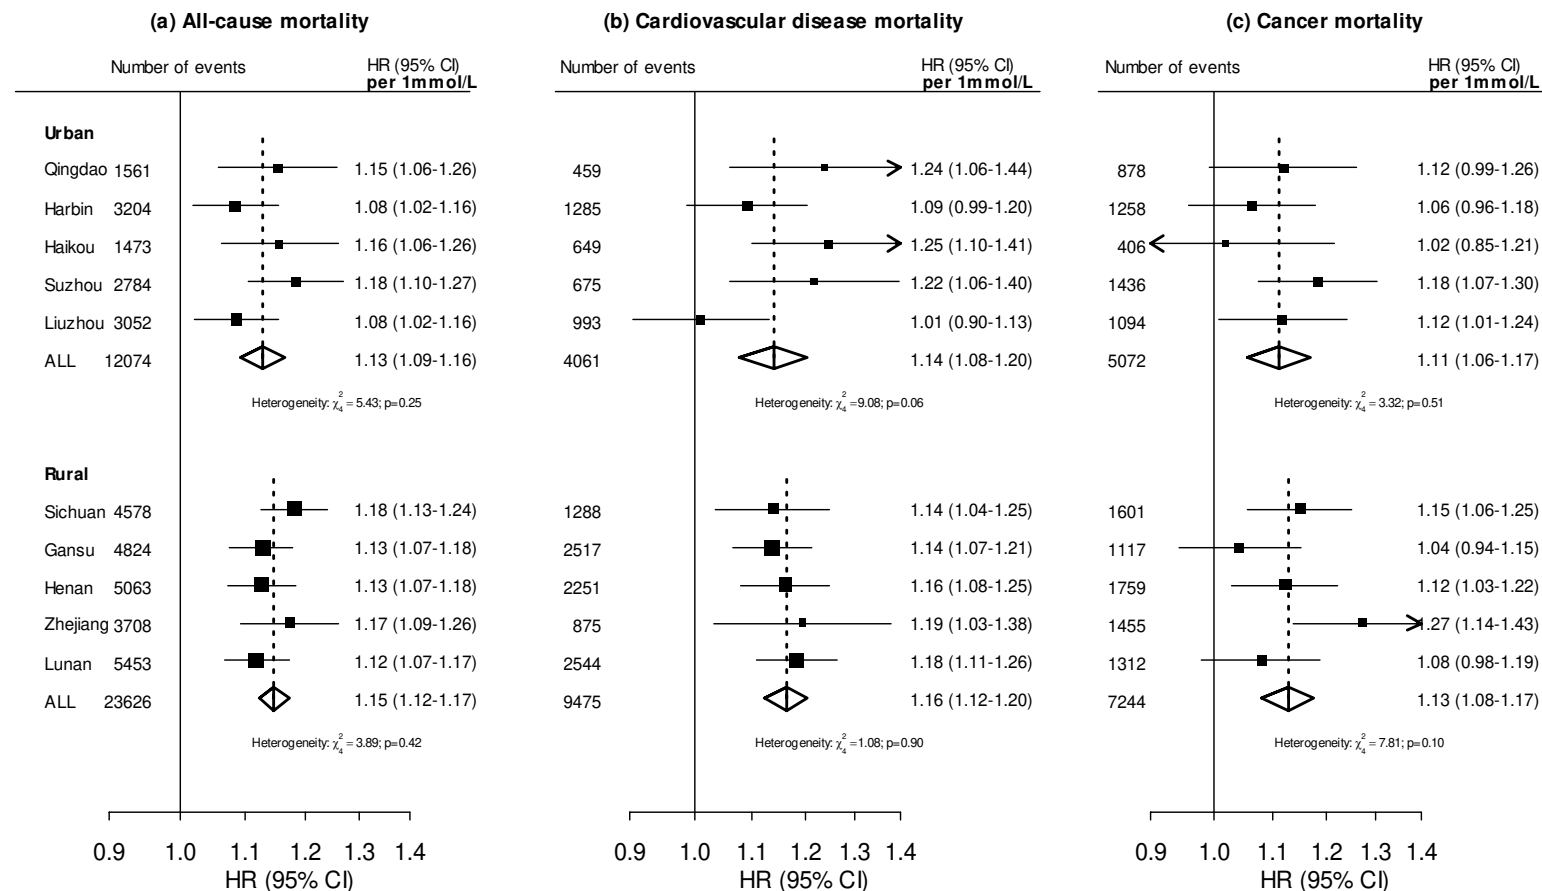

**Figure S7. Associations of usual random plasma glucose with liver disease mortality**

HRs are presented stratified by age-at-risk, sex and study area and adjusted for education, smoking, alcohol, physical activity, body mass index, waist and hip circumference and systolic blood pressure. HRs are plotted against mean usual RPG level in each category. Squares represent the HR with area inversely proportional to the variance of the log HR. Grey squares represent the HR among participants with screen-detected diabetes (baseline RPG  $\geq 11.1$  mmol/L). Vertical lines indicate the 95% CI. RPG=random plasma glucose.

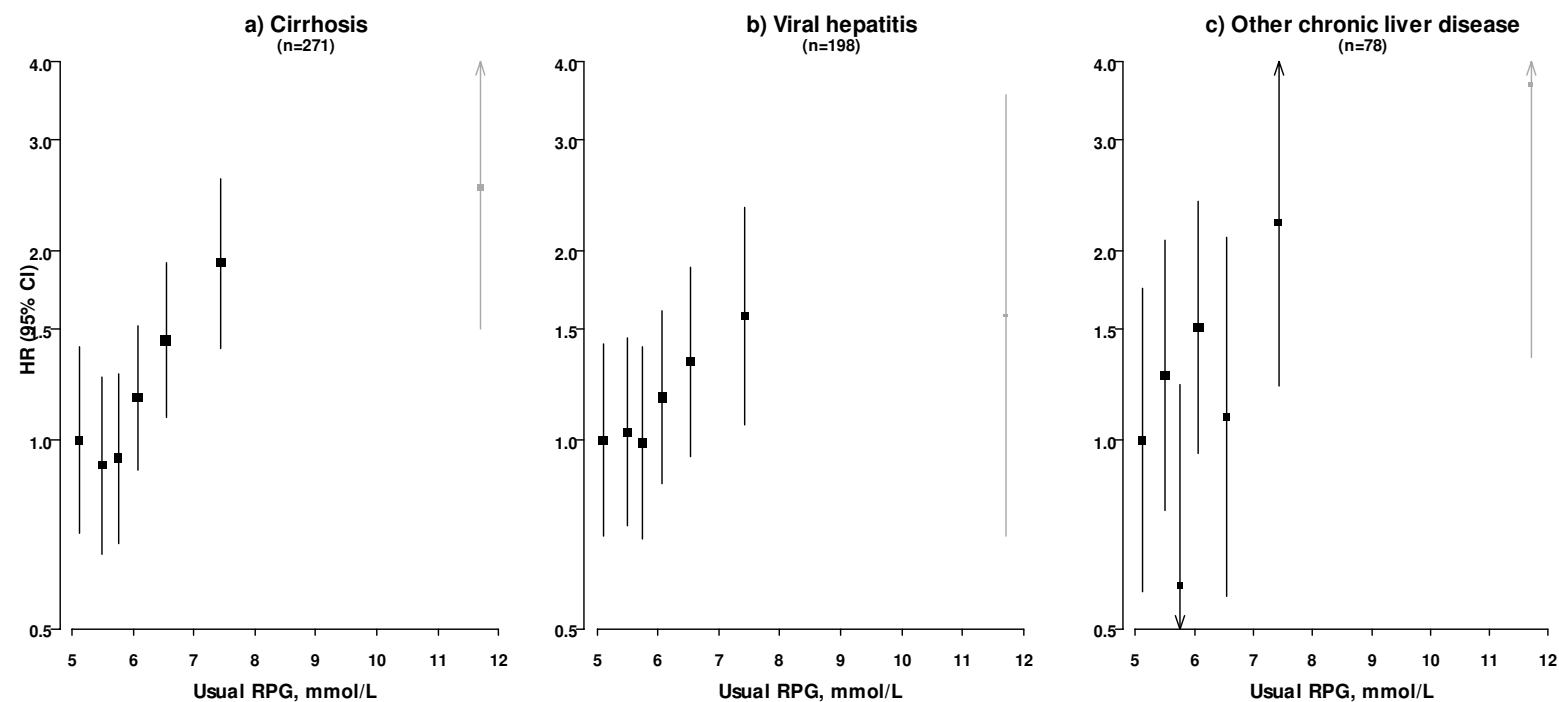

**Figure S8. Associations of usual random plasma glucose with respiratory disease mortality**

HRs are presented stratified by age-at-risk, sex and study area and adjusted for education, smoking, alcohol, physical activity, body mass index, waist and hip circumference and systolic blood pressure. HRs are plotted against mean usual RPG level in each category. Squares represent the HR with area inversely proportional to the variance of the log HR. Vertical lines indicate the 95% CI. Grey squares represent the HR among participants with screen-detected diabetes (baseline RPG  $\geq 11.1$  mmol/L). COPD=chronic obstructive pulmonary disease; RPG=random plasma glucose.

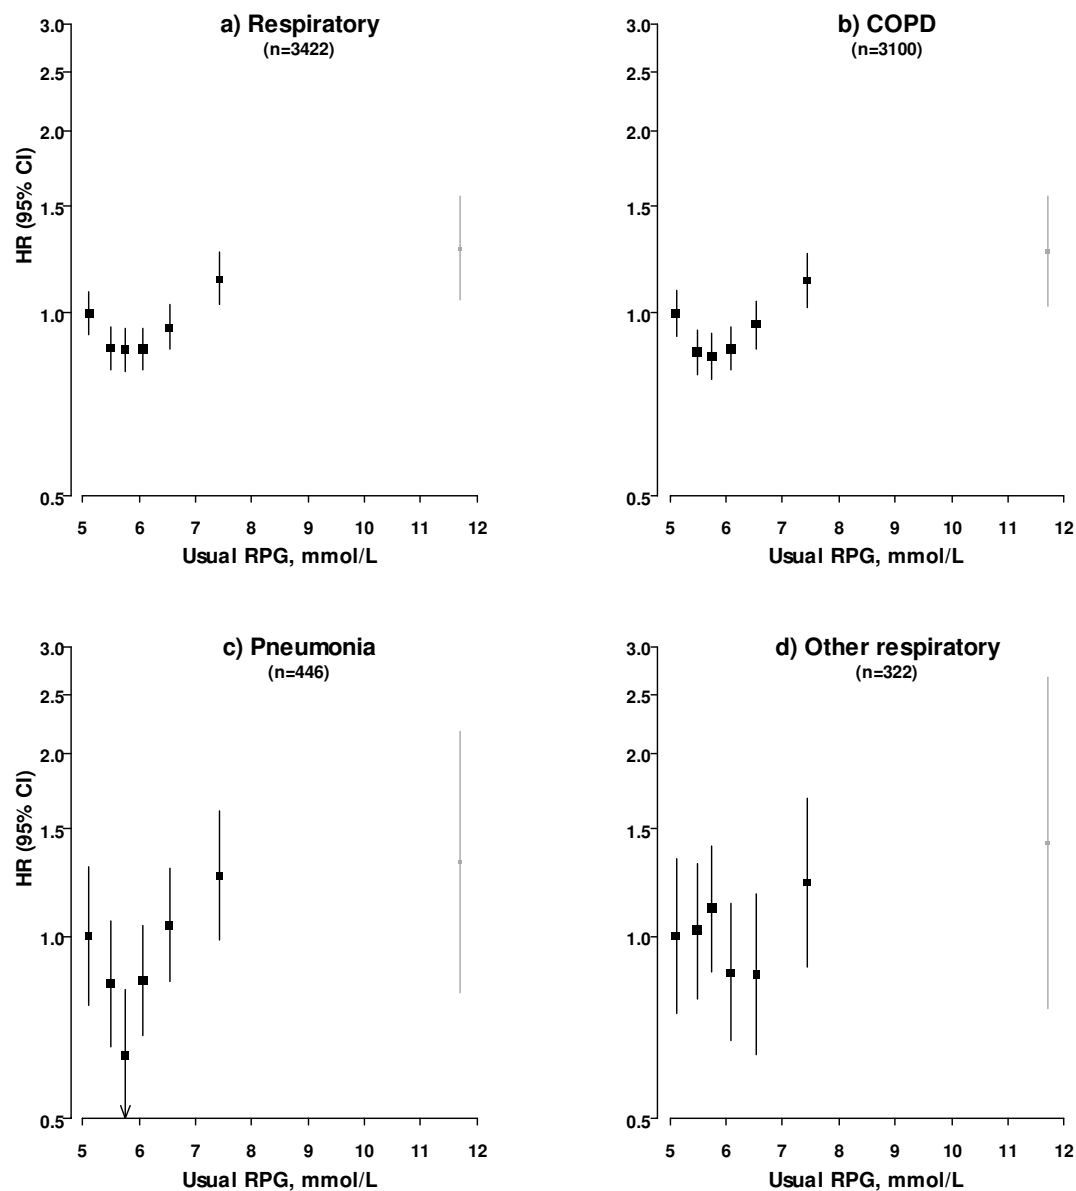

Supplement: bmjdrc-2021-002495supp001_data_supplement.pdf [file bmjdrc-2021-002495supp001_data_supplement.pdf]
